# Supplementary material
Source: PubMed Central journal article supplement (PMC4312238)
Supplement: NIHMS631899-supplement-3.pdf [file NIHMS631899-supplement-3.pdf]

## Supplemental Figures

### Figure S1

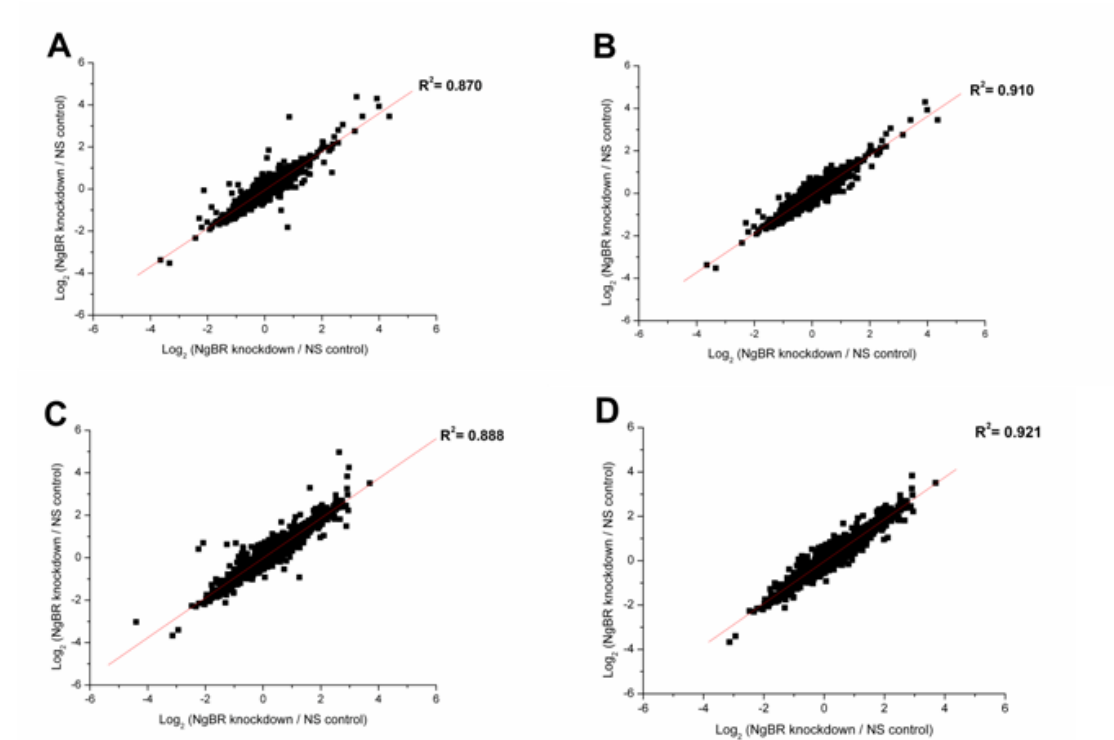

**Figure S1.** Correlation between the two technical replicated quantification results of NgBR knockdown and NS control MDA-MB-231 breast cancer cells (A) before and (B) after being filtered by the RSD criterion to control the quantification accuracy in biological replicate 1. Quantification results (C) before and (D) after being filtered by the RSD in biological replicate 2 are also being shown.
