# Supplementary material
Source: PubMed Central journal article supplement (PMC4312238)
Supplement: NIHMS631899-supplement-5.pdf [file NIHMS631899-supplement-5.pdf]

**Table S1. Primers for real-time PCR**

| <b>Gene Name</b>  | <b>Accession Number</b> | <b>Forward Primer</b>          | <b>Reverse Primer</b>          |
|-------------------|-------------------------|--------------------------------|--------------------------------|
| <b>NgBR</b>       | NM_138459               | 5'-TGCCAGTTAGTAGCCCAGAAGCAA-3' | 5'-TGATGTGCCAGGGAAGAAAGCCTA-3' |
| <b>Beta-Actin</b> | NM_001101               | 5'-TTCTACAATGAGCTGCGTGTGGCT-3' | 5'-TAGCACAGCCTGGATAGCAACGTA-3' |
| <b>Collegen-1</b> | NM_000088               | 5'-CCCCTGGAAAGAATGGAGATG-3'    | 5'-TCCAAACCACTGAAACCTCTG-3'    |
| <b>EpCAM</b>      | NM_002354               | 5'-CAATGCAGGGTCTAAAAGCTG-3'    | 5'-CACCCATCTCCTTTATCTCAGC-3'   |
| <b>Laminin-1</b>  | NM_005559               | 5'-AATGGAGTGAGACAGGAACAAG-3'   | 5'-TGACCATACGATGCCTTGATG-3'    |
| <b>Nectin-1</b>   | NM_002855               | 5'-CGGATGGACGTGAAGCTC-3'       | 5'-CAGGCTGTAGTTGATGGGTC-3'     |
