# Supplementary material
Source: PubMed Central journal article supplement (PMC4312238)

Figure 3

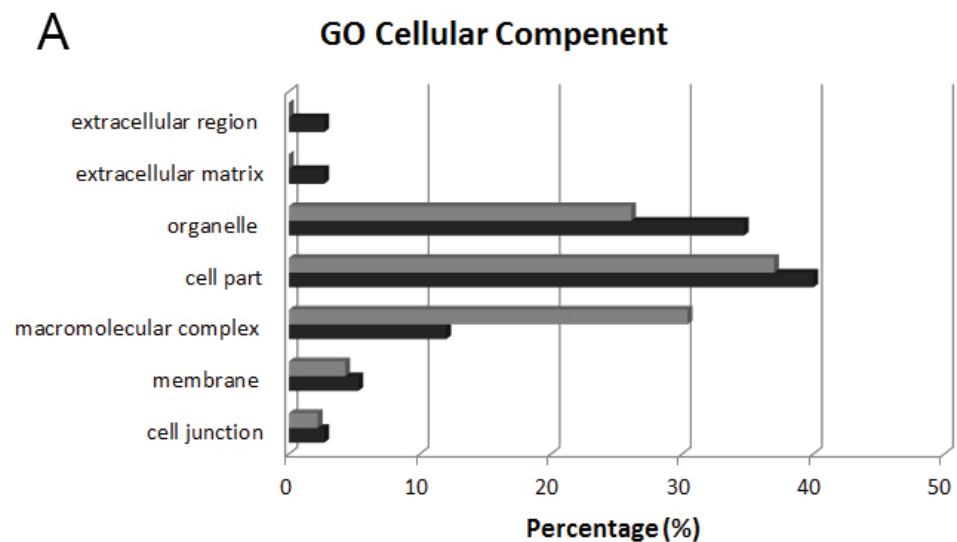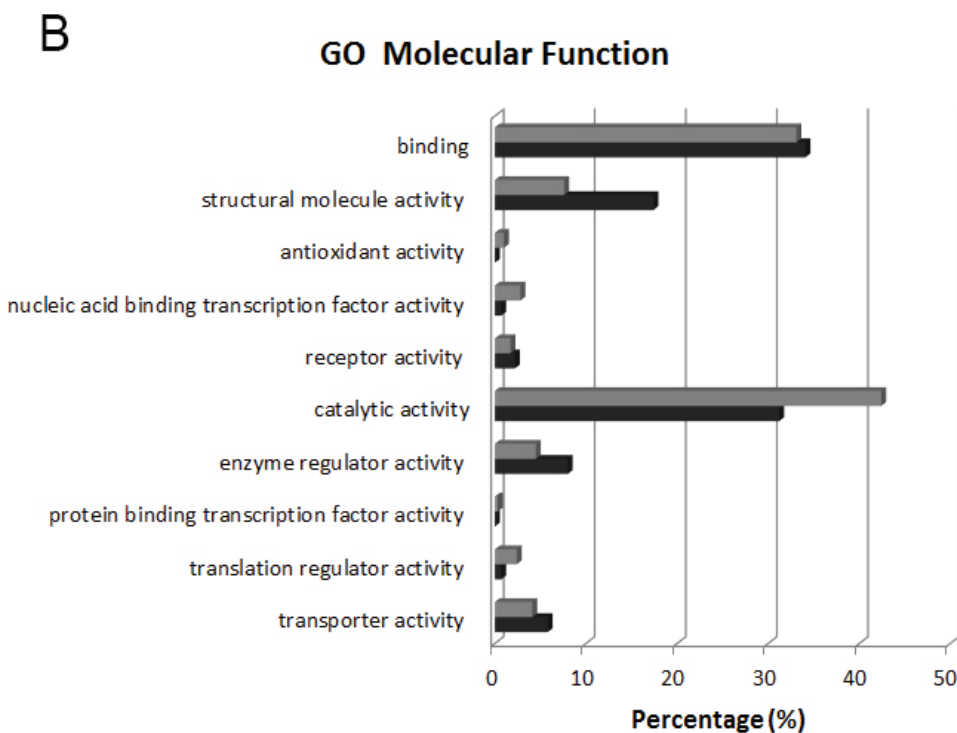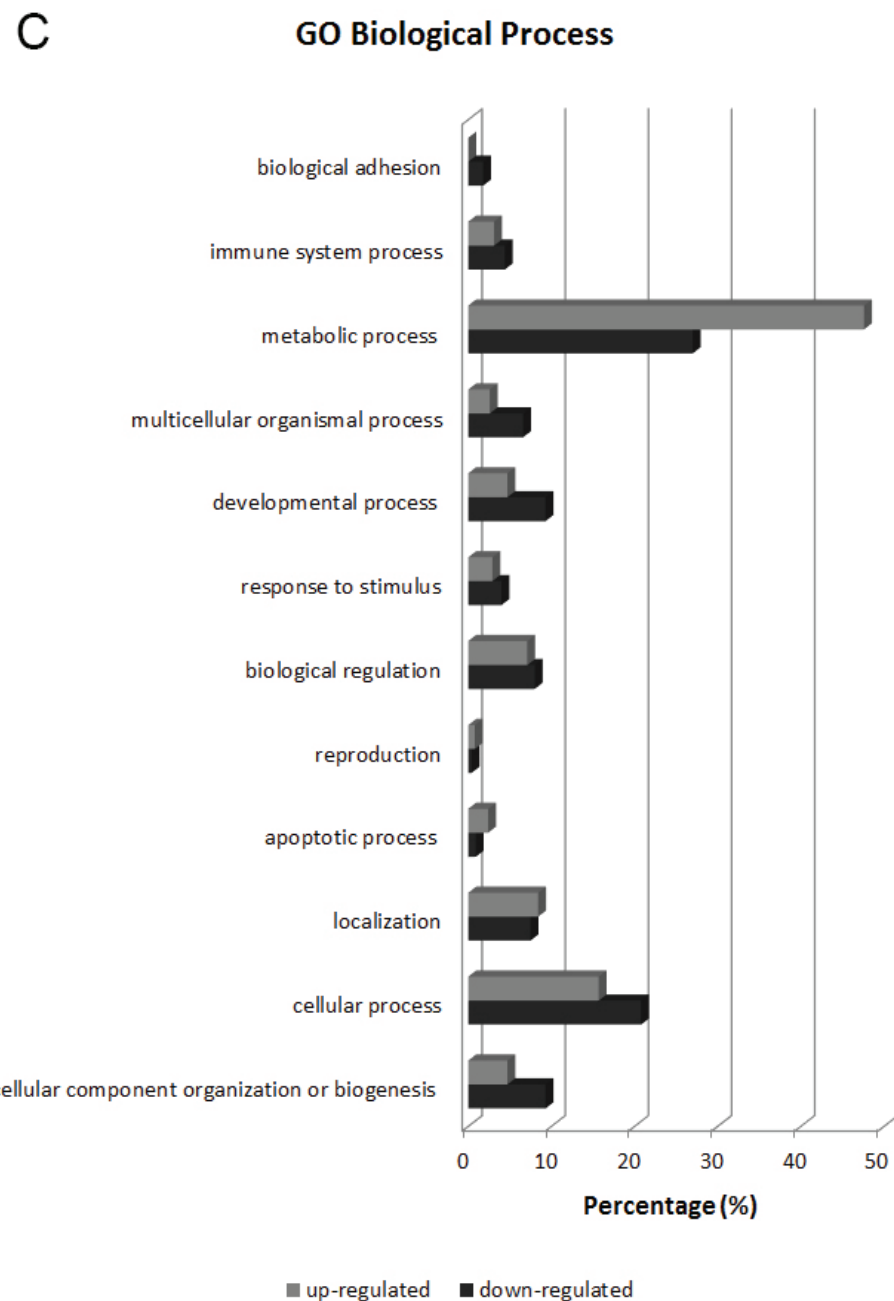

Figure 4

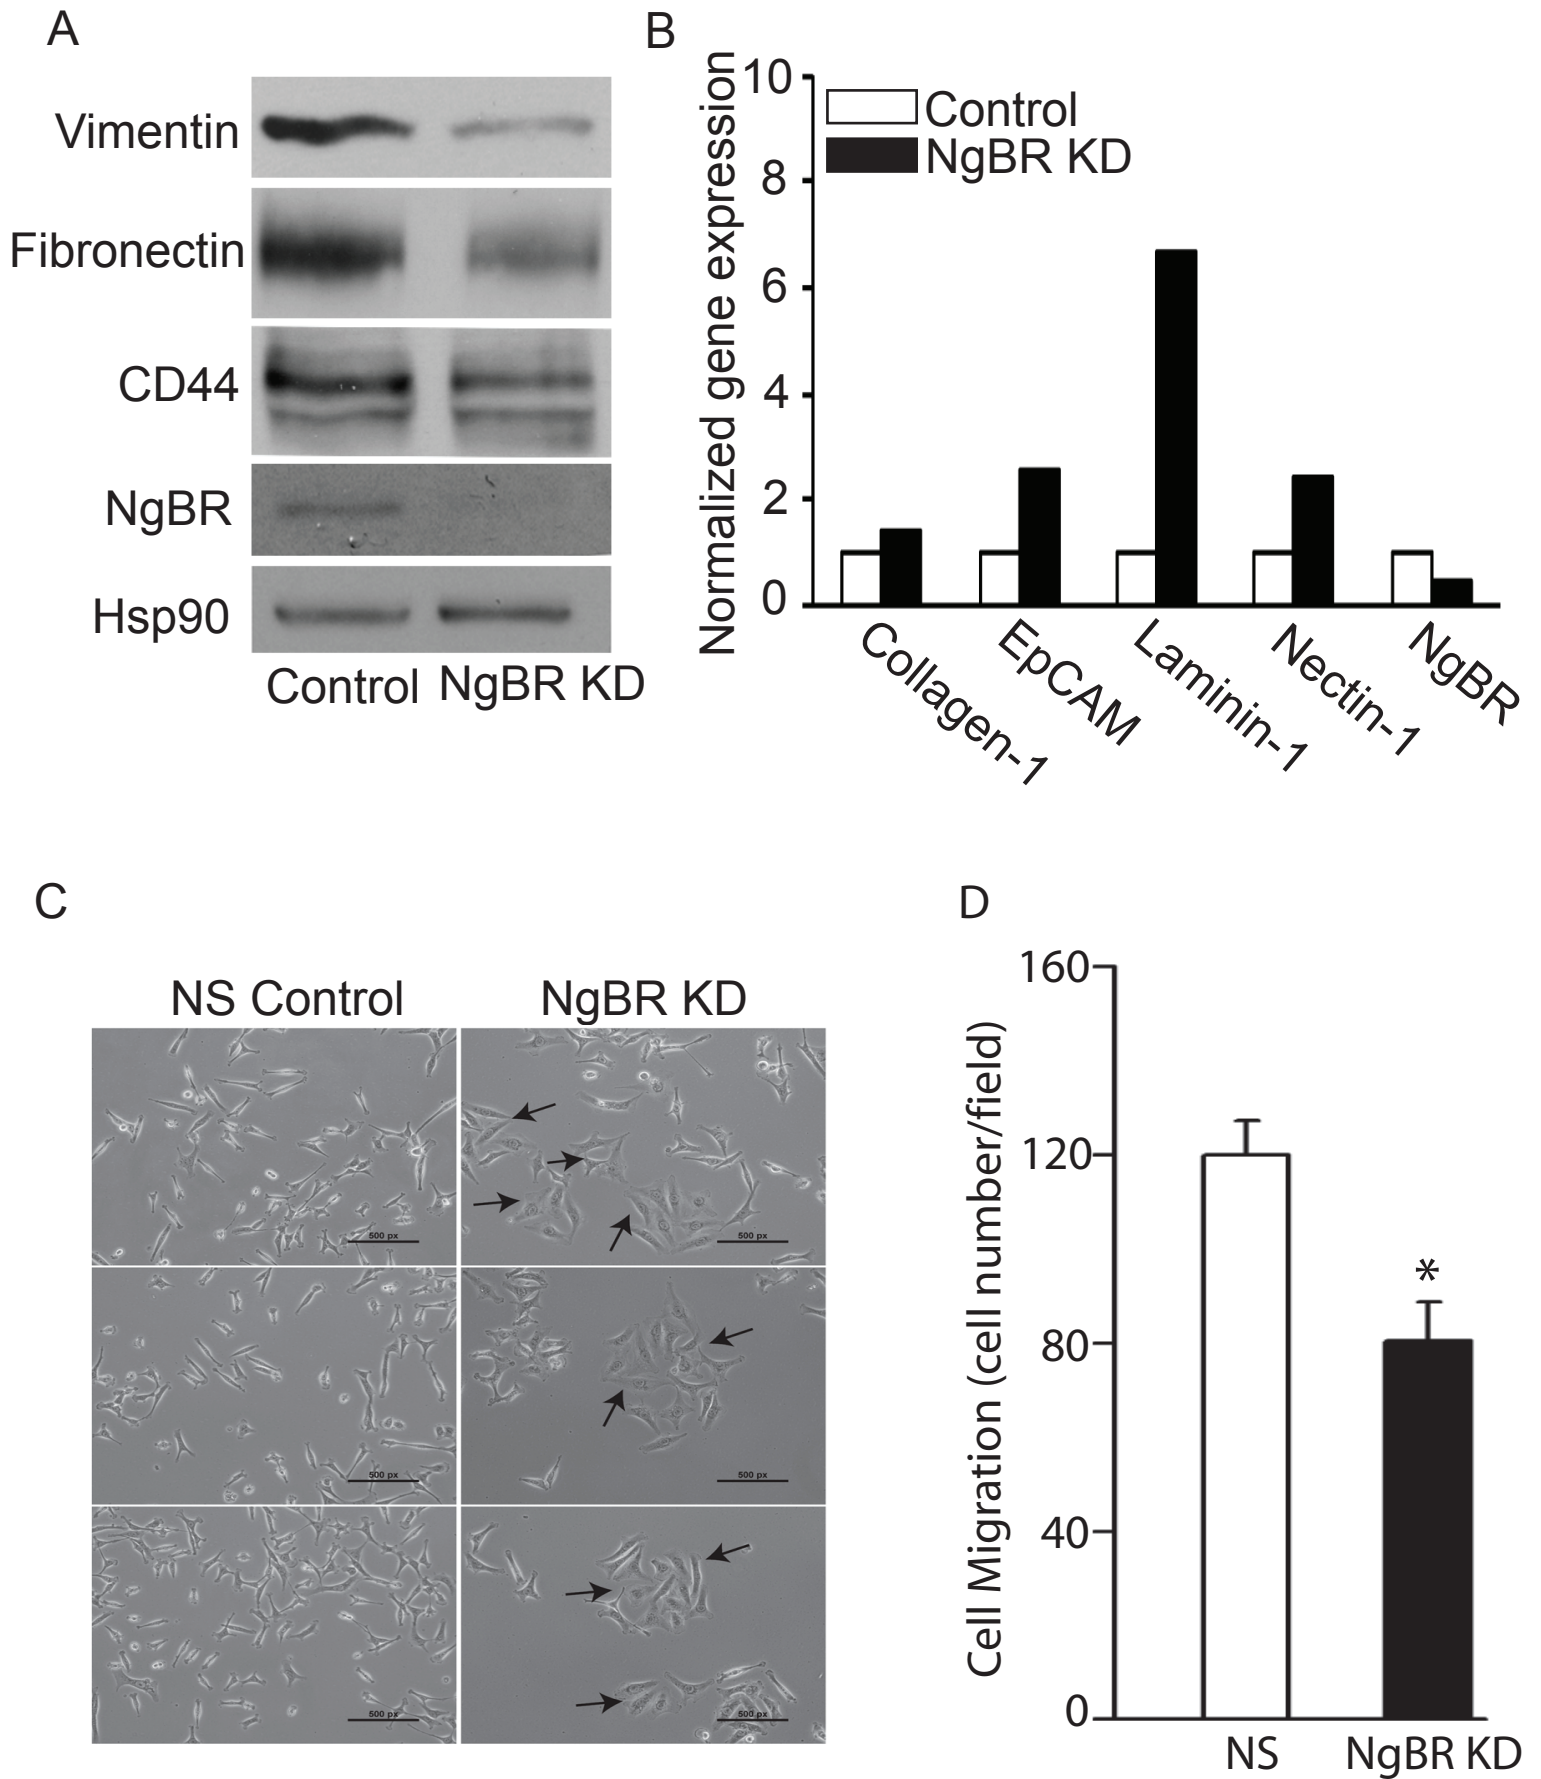

Figure 5

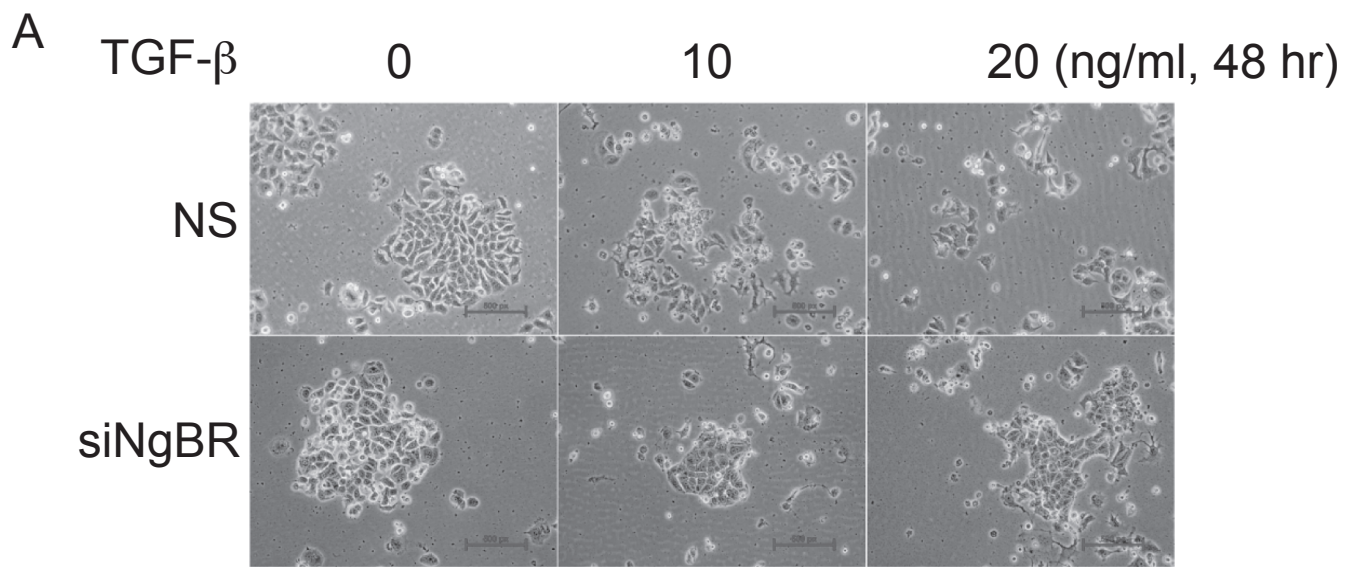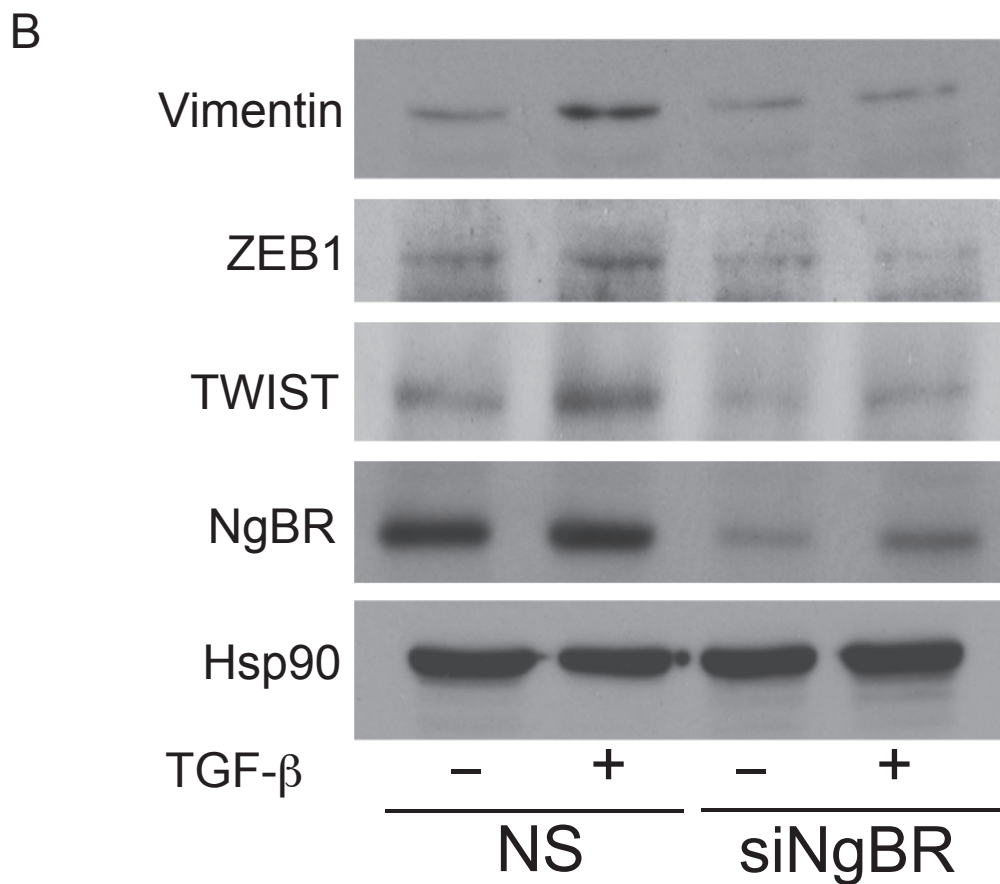

Supplement: NIHMS631899-supplement-1.pdf [file NIHMS631899-supplement-1.pdf]

Figure 6

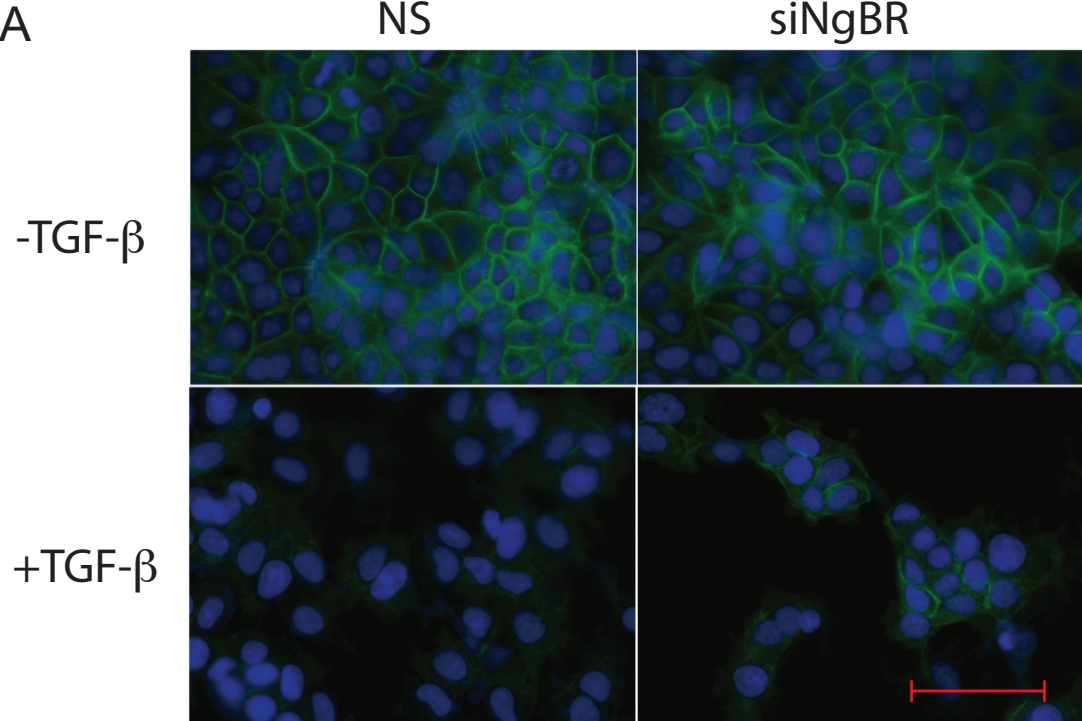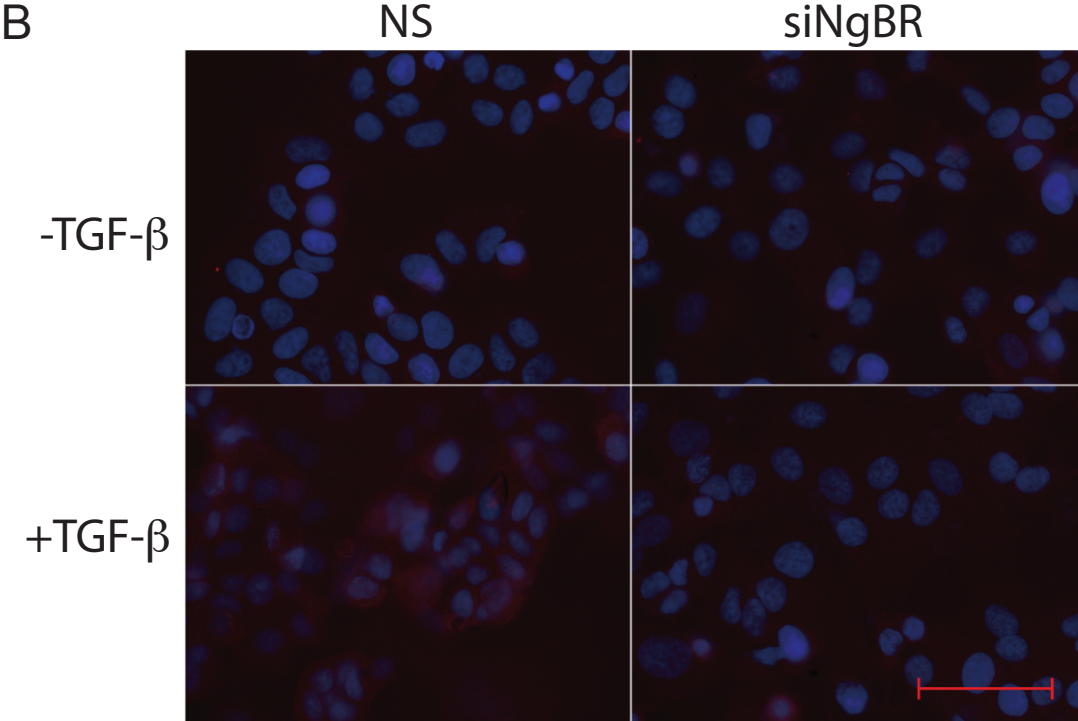

Figure 7

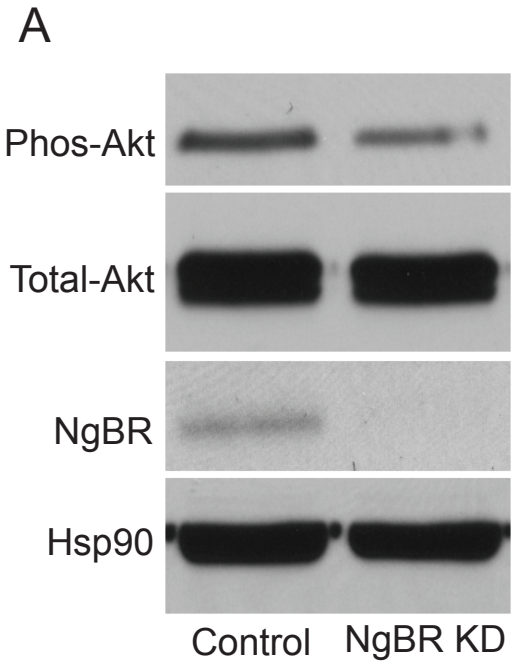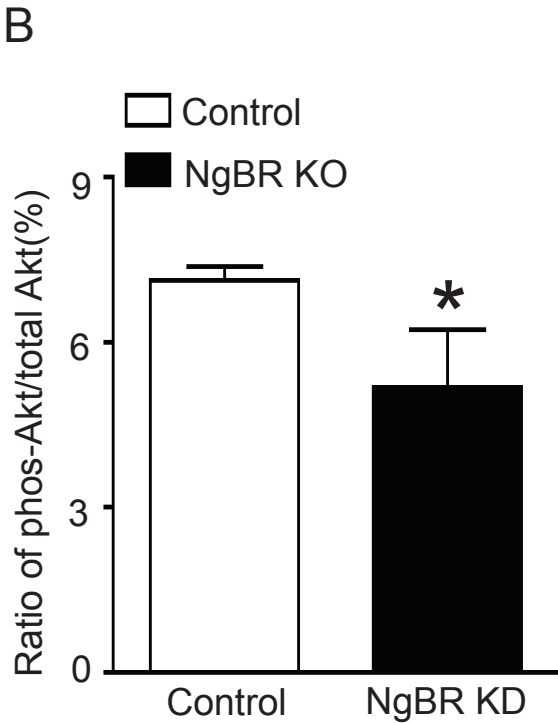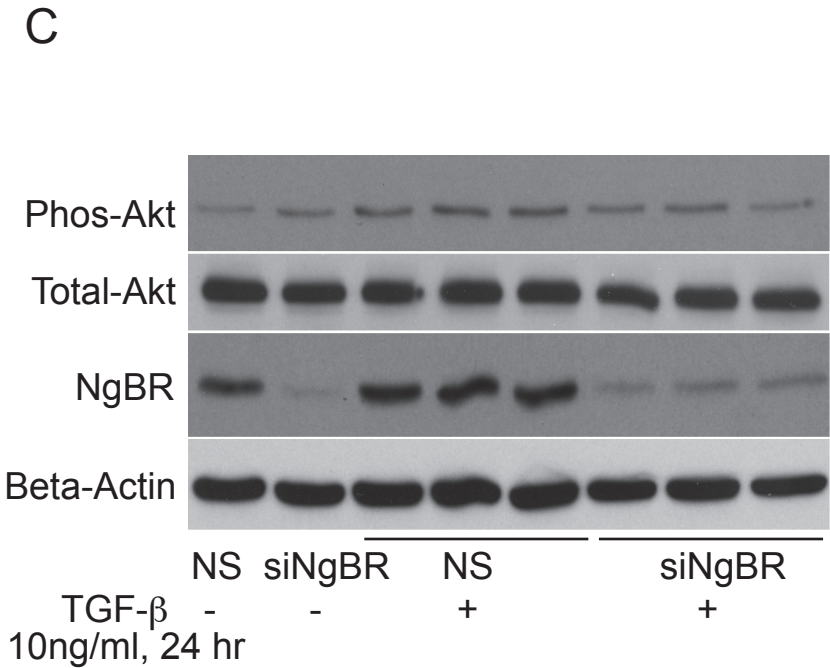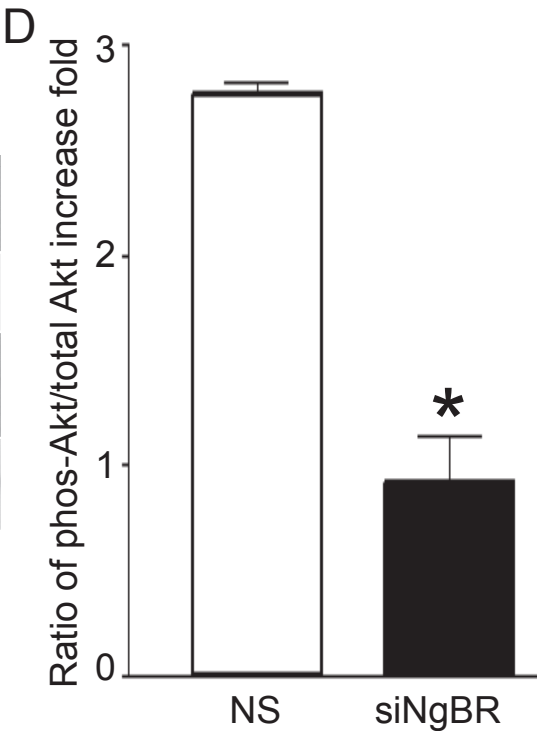

Supplement: NIHMS631899-supplement-2.pdf [file NIHMS631899-supplement-2.pdf]

Figure S2

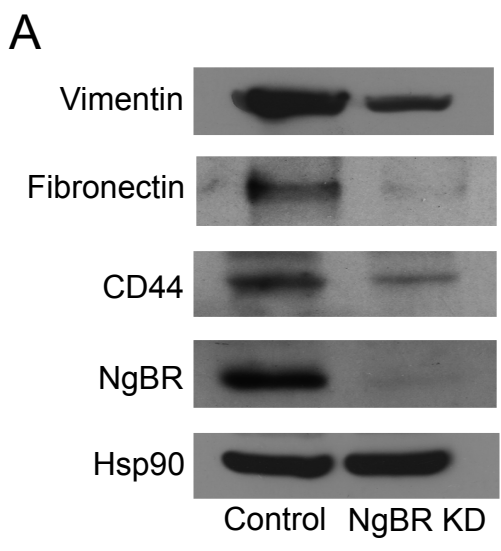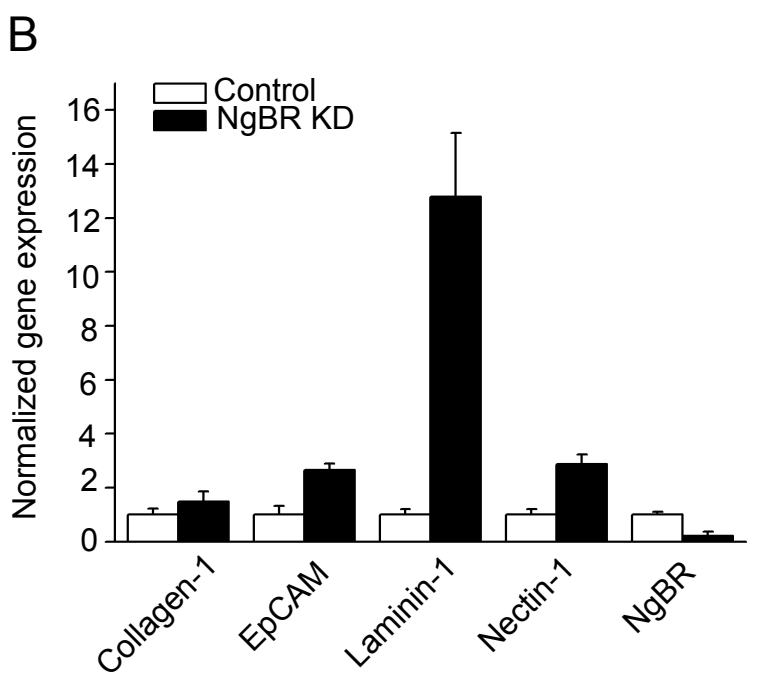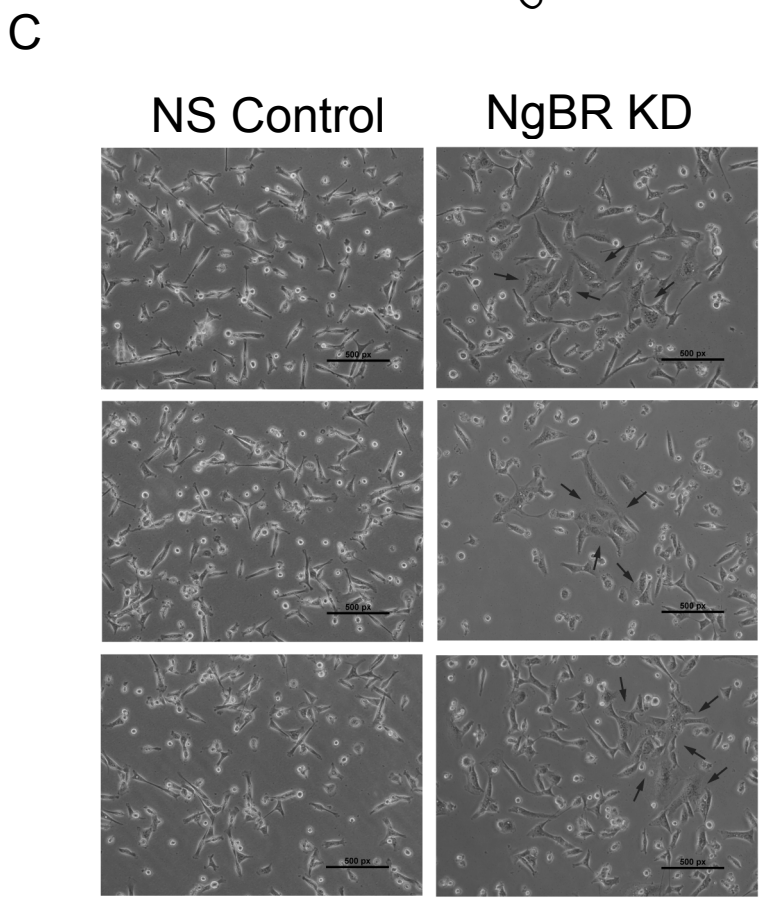

# Supplemental Figure S3

**A**

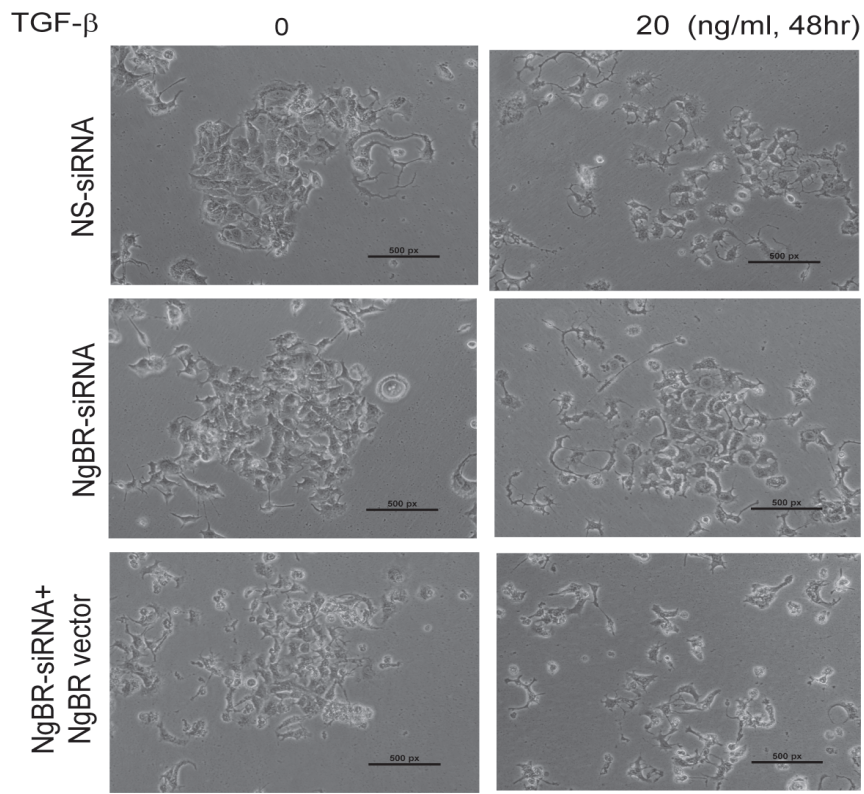

**B**

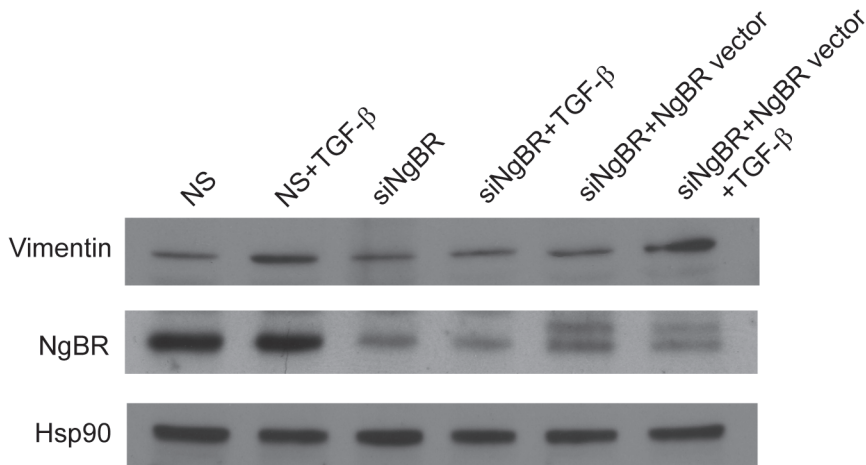

**C**

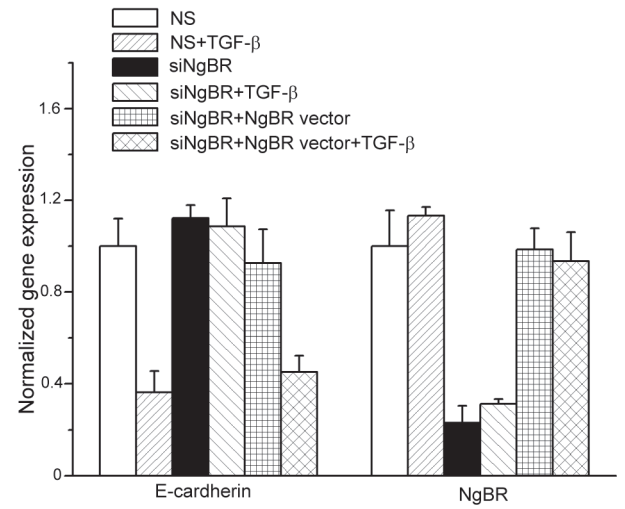

# Supplemental Figure S4

A

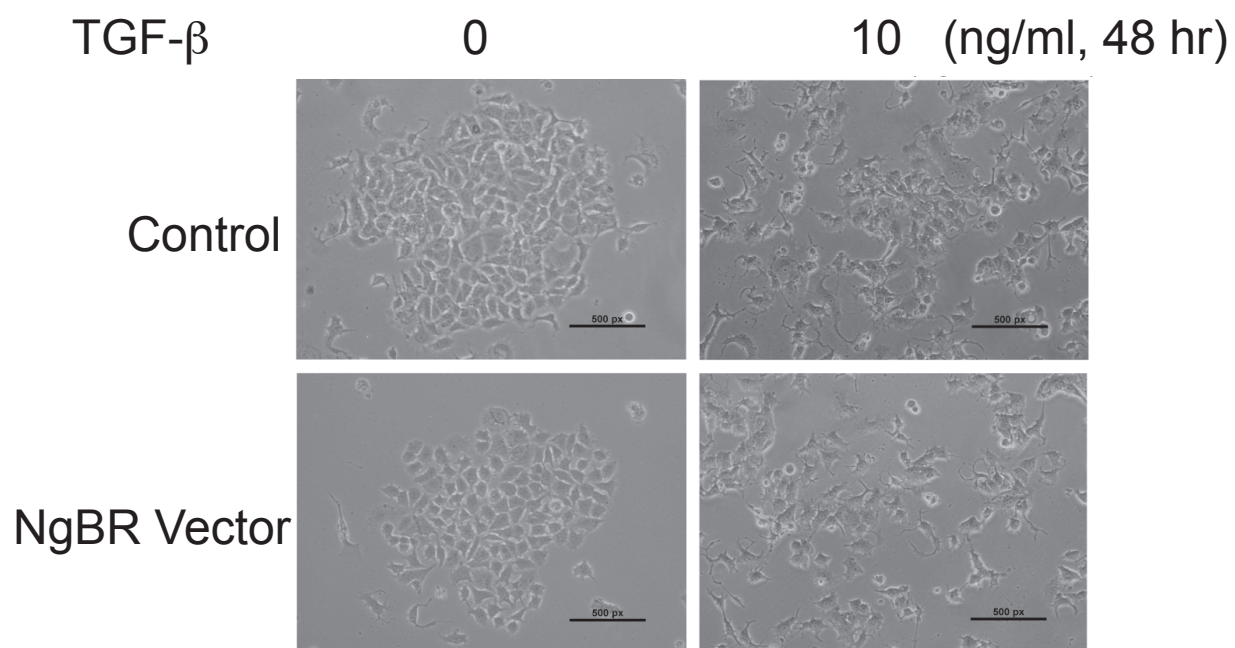

B

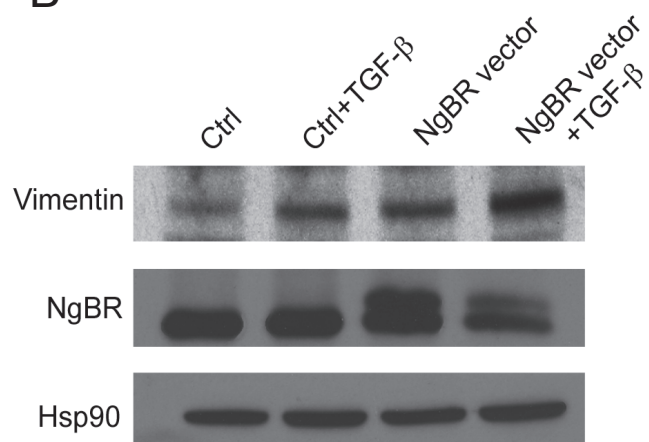

C

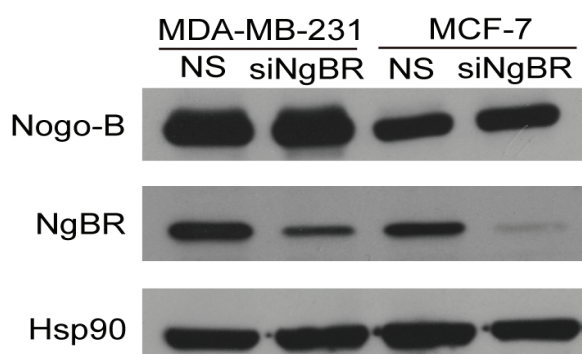

Supplement: NIHMS631899-supplement-4.pdf [file NIHMS631899-supplement-4.pdf]
